# Supplementary material for: Curing and viscoelasticity of vitrimers
Source: Royal Society of Chemistry journal article supplement (doi:10.1039/c6sm00707d), 2016-06-27
Supplement: c6sm00707d1.pdf [file c6sm00707d1.pdf]

## ***Supporting information for:***

### **Curing and Viscoelasticity of Vitrimers**

by Frank Snijkers, Rossana Pasquino and Alfonso Maffezzoli

#### ***van Gorp-Palmen plots of the viscoelastic master curves***

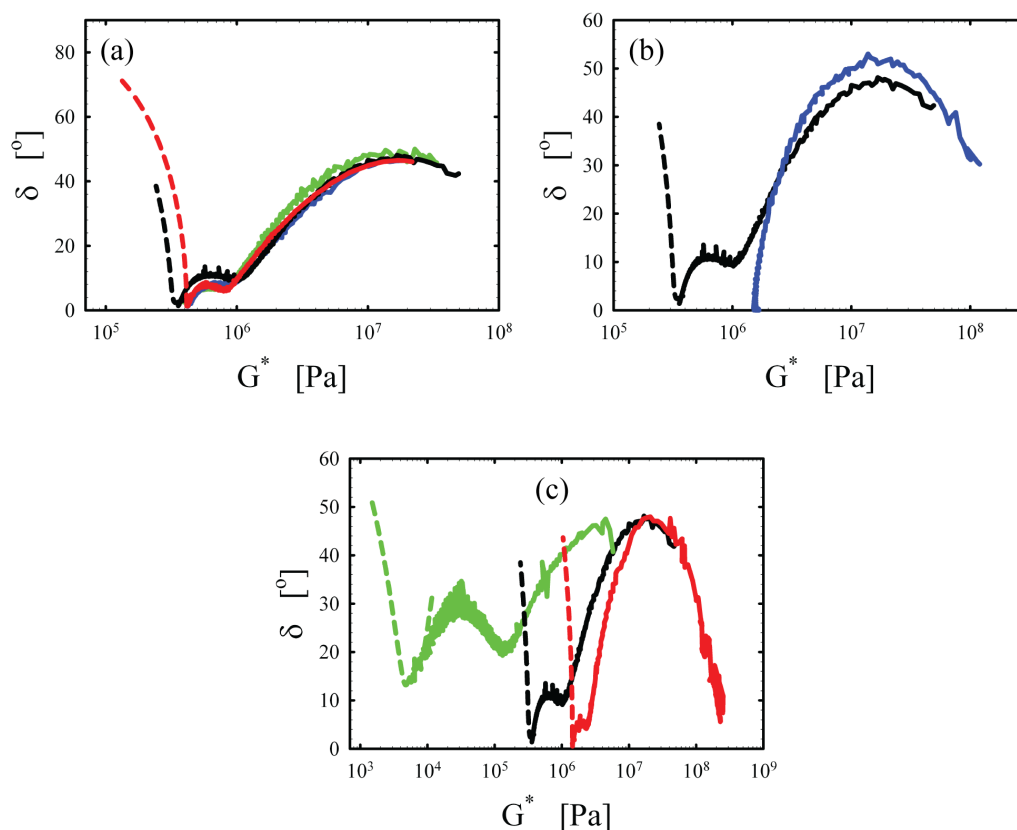

Fig. S1 “van Gorp-Palmen”-plots, i.e. phase angle  $\delta = \arctan(G''/G')$  as function of complex modulus  $G^* = (G'^2 + G''^2)^{0.5}$ , of the viscoelastic master curves for the different samples at  $T_{ref} = 70$  °C following Ref. S1. (a) Data of Fig. 2a. Full lines represent the master curves of the oscillatory data; dashed lines are the converted creep and stress relaxation data. Colors as in Fig. 2a. (b) Data of Fig. 3a. Full lines represent the master curves of the oscillatory data; dashed line is the converted creep data. Colors as in Fig. 3a. (c) Data of Fig. 4a. Full lines represent the master curves of the oscillatory data; dashed lines are the converted creep data. Colors as in Fig. 4a.
